# Supplementary material
Source: PubMed Central journal article supplement (PMC3581701)
Supplement: NIHMS424184-supplement-213_2012_2915_MOESM1_ESM.pdf [file NIHMS424184-supplement-213_2012_2915_MOESM1_ESM.pdf]

| <b>Supplemental Table 1: THC Doses by Study</b> |                                   |                          |                               |                        |
|-------------------------------------------------|-----------------------------------|--------------------------|-------------------------------|------------------------|
| <b>Study</b>                                    | <b>Duration of infusion (min)</b> | <b>THC doses (mg/kg)</b> | <b>Total dose (mg/70 kg )</b> | <b>Categorization*</b> |
| #1                                              | 10                                | 0, 0.015, 0.030          | 0, 1.05, 2.1                  | Placebo, low, medium   |
| #2                                              | 20                                | 0, 0.018, 0.036          | 0, 1.26, 2.52                 | Placebo, low, medium   |
| #3                                              | 10                                | 0, 0.015                 | 0, 1.05                       | Placebo, low           |
| #4                                              | 20                                | 0, 0.05                  | 0, 3.5                        | Placebo, high          |
| #5                                              | 10                                | 0, 0.015, 0.030          | 0, 1.05, 2.1                  | Placebo, low, medium   |

\*Placebo=0.00 mg/kg; low=0.01-0.02 mg/kg; medium=0.03-0.04 mg/kg; high=0.05 mg/kg
